# Supplementary material for: circPTPN12/miR-21–5 p/∆Np63α pathway contributes to human endometrial fibrosis
Source: eLife journal article supplement (doi:10.7554/elife.65735), 2021-06-16

# Full unedited gel for Fig. 1F

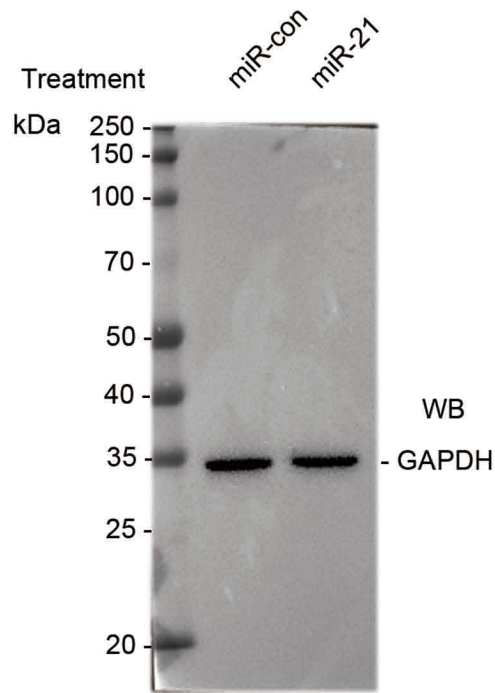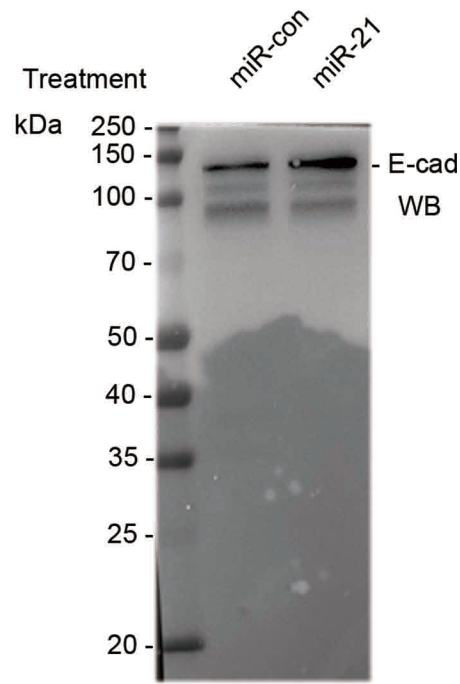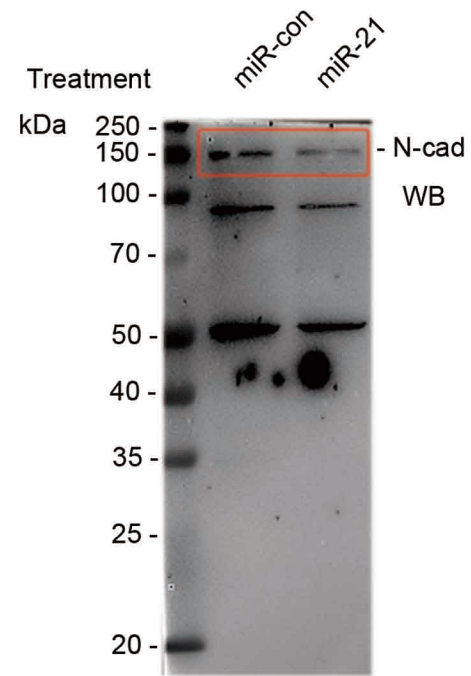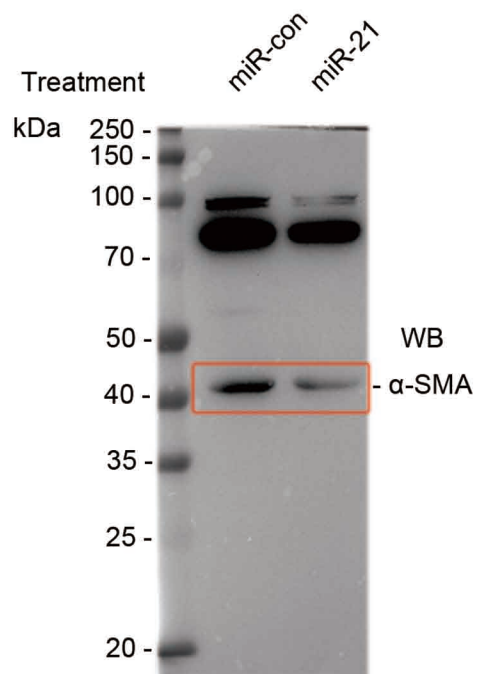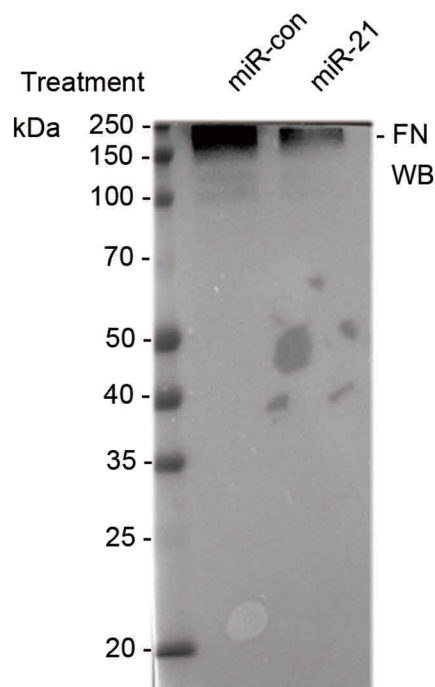

Supplement: fig1-data4 [file elife-65735-fig1-data4-v1.pdf]
