# Supplementary material for: circPTPN12/miR-21–5 p/∆Np63α pathway contributes to human endometrial fibrosis
Source: eLife journal article supplement (doi:10.7554/elife.65735), 2021-06-16
Supplement: fig4-data10 [file elife-65735-fig4-data10-v1.pdf]

# Full unedited gel for Fig. 4J

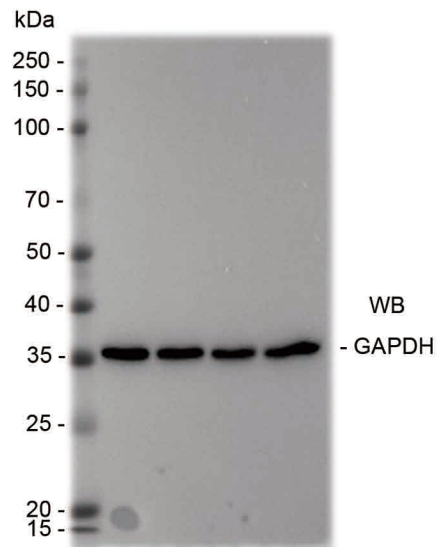

| Treatment     | - | + | + | + |
|---------------|---|---|---|---|
| Ad-Δnp63α     | - | + | + | + |
| miR-21 mimic  | - | - | + | + |
| Ad-circPTPN12 | - | - | - | + |

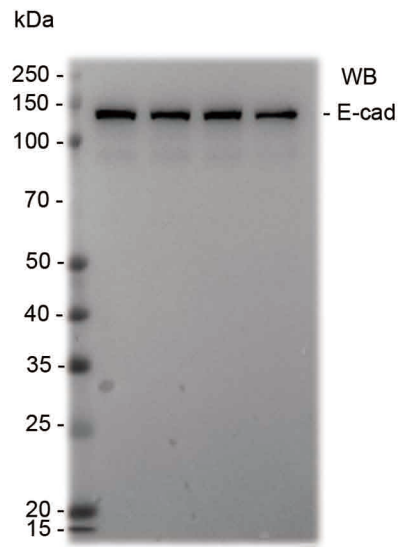

| Treatment     | - | + | + | + |
|---------------|---|---|---|---|
| Ad-Δnp63α     | - | + | + | + |
| miR-21 mimic  | - | - | + | + |
| Ad-circPTPN12 | - | - | - | + |

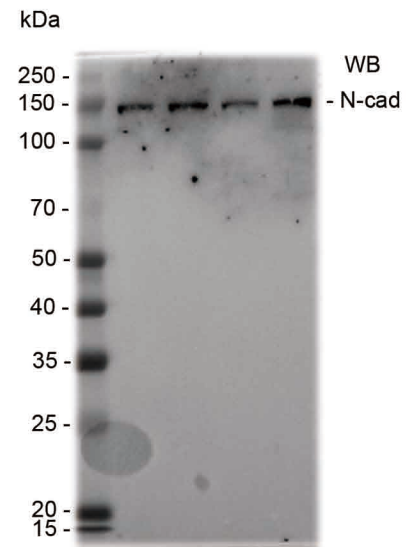

| Treatment     | - | + | + | + |
|---------------|---|---|---|---|
| Ad-Δnp63α     | - | + | + | + |
| miR-21 mimic  | - | - | + | + |
| Ad-circPTPN12 | - | - | - | + |

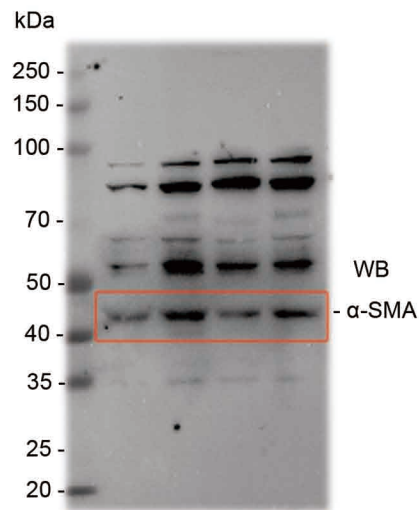

| Treatment     | - | + | + | + |
|---------------|---|---|---|---|
| Ad-Δnp63α     | - | + | + | + |
| miR-21 mimic  | - | - | + | + |
| Ad-circPTPN12 | - | - | - | + |

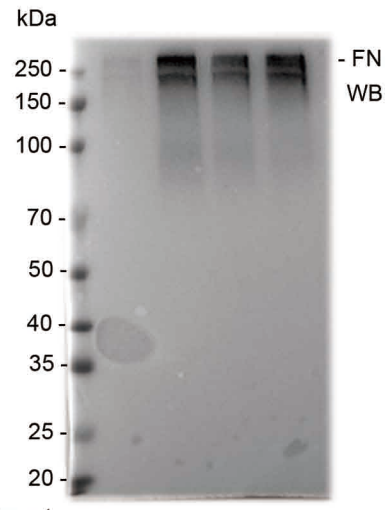

| Treatment     | - | + | + | + |
|---------------|---|---|---|---|
| Ad-Δnp63α     | - | + | + | + |
| miR-21 mimic  | - | - | + | + |
| Ad-circPTPN12 | - | - | - | + |
