# Supplementary material for: circPTPN12/miR-21–5 p/∆Np63α pathway contributes to human endometrial fibrosis
Source: eLife. 2021 Jun 16;10:e65735. doi: 10.7554/eLife.65735 (PMC8208816; doi:10.7554/eLife.65735)
Supplement: Figure 1—source data 3. [file elife-65735-fig1-data3.xlsx]

## Sheet: Sheet1
	Inh-NC			Inh-21
E-cad	0.764169	0.854196	0.739911	0.529625	0.552157	0.628364
N-cad	0.73407	0.798665	0.731828	1.35525	1.29597	1.62801
-SMA	0.394417	0.4125	0.437694	0.625908	0.56992	0.640341
FN	0.215815	0.320348	0.254787	0.517573	0.480792	0.642837
