# Supplementary material for: circPTPN12/miR-21–5 p/∆Np63α pathway contributes to human endometrial fibrosis
Source: eLife. 2021 Jun 16;10:e65735. doi: 10.7554/eLife.65735 (PMC8208816; doi:10.7554/eLife.65735)
Supplement: Figure 1—source data 5. [file elife-65735-fig1-data5.xlsx]

## Sheet: Sheet1
	miR-NC			miR-21
E-cad	0.600603	0.523894	0.577151	1.01232	1.04262	0.849264
N-cad	0.3017	0.282197	0.303762	0.197227	0.15537	0.203464
-SMA	0.418193	0.33727	0.405489	0.208366	0.168609	0.178953
FN	2.19097	2.10486	2.35838	1.10418	1.02586	1.10334
