# Supplementary material for: circPTPN12/miR-21–5 p/∆Np63α pathway contributes to human endometrial fibrosis
Source: eLife. 2021 Jun 16;10:e65735. doi: 10.7554/eLife.65735 (PMC8208816; doi:10.7554/eLife.65735)
Supplement: Figure 2—source data 3. [file elife-65735-fig2-data3.xlsx]

## Sheet: Sheet1
	Mock						RNase R
circPTPN12	0.448685	0.848963	0.708959	0.948536	0.866802	2.17916	1.22584	1.9504	2.72031	1.36016	1.70974	5.63249
PTPN12	1.03236	1.14548	0.943403	0.576721	0.911267	1.39083	0.078888	0.097122	0.124649	0.043163	0.099163	0.186332
