# Supplementary material for: circPTPN12/miR-21–5 p/∆Np63α pathway contributes to human endometrial fibrosis
Source: eLife. 2021 Jun 16;10:e65735. doi: 10.7554/eLife.65735 (PMC8208816; doi:10.7554/eLife.65735)
Supplement: Figure 2—source data 4. [file elife-65735-fig2-data4.xlsx]

## Sheet: Sheet1
	circPTPN12				PTPN12
0h	1.29088	0.941712	1.06685	0.716162	1.2398	0.946128	1.10199	0.712078
4h	1.45736	1.01632	1.55117	1.62266	0.570424	0.702275	0.74748	0.6199
8h	1.78183	1.4126	1.83828	2.55506	0.489747	0.463328	0.547188	0.615618
12h	1.34104	1.22974	1.52452	1.5458	0.473064	0.39505	0.570424	0.476354
24h	1.97022	3.12392	2.11163	1.73912	0.414691	0.6199	0.358515	0.37374
