# Supplementary material for: circPTPN12/miR-21–5 p/∆Np63α pathway contributes to human endometrial fibrosis
Source: eLife. 2021 Jun 16;10:e65735. doi: 10.7554/eLife.65735 (PMC8208816; doi:10.7554/eLife.65735)
Supplement: Figure 2—source data 5. [file elife-65735-fig2-data5.xlsx]

## Sheet: Sheet1
	Cytoplasmic fraction				Nuclear fraction
circPTPN12	0.983189	0.973694	0.972974	0.974047	0.016811	0.026306	0.027026	0.025953
GAPDH	0.997226	0.993337	0.988136	0.99586	0.002774	0.006663	0.011864	0.00414
U6	0.221905	0.2748	0.20902	0.18181	0.778095	0.7252	0.79098	0.81819
