# Supplementary material for: circPTPN12/miR-21–5 p/∆Np63α pathway contributes to human endometrial fibrosis
Source: eLife. 2021 Jun 16;10:e65735. doi: 10.7554/eLife.65735 (PMC8208816; doi:10.7554/eLife.65735)
Supplement: Figure 3—source data 1. [file elife-65735-fig3-data1.xlsx]

## Sheet: Sheet1
control	circPTPN12
0.000309	0.469761
0.000214	0.469761
0.000292	0.673617
