# Supplementary material for: circPTPN12/miR-21–5 p/∆Np63α pathway contributes to human endometrial fibrosis
Source: eLife. 2021 Jun 16;10:e65735. doi: 10.7554/eLife.65735 (PMC8208816; doi:10.7554/eLife.65735)
Supplement: Figure 3—source data 2. [file elife-65735-fig3-data2.xlsx]

## Sheet: Sheet1
Bio-NC	Bio-circPTPN12
0.00083933	0.0313681
0.00124718	0.0266975
0.0011165	0.0432229
