# Supplementary material for: circPTPN12/miR-21–5 p/∆Np63α pathway contributes to human endometrial fibrosis
Source: eLife. 2021 Jun 16;10:e65735. doi: 10.7554/eLife.65735 (PMC8208816; doi:10.7554/eLife.65735)
Supplement: Figure 3—source data 3. [file elife-65735-fig3-data3.xlsx]

## Sheet: Sheet1
miR-NC	miR-21	inh-NC	inh-21
1.01135	0.676868	0.938054	1.08439
1.09404	0.705455	0.984664	1.3049
1.06496	0.799892	1.0464	1.0187
0.972716	0.805149	0.996919	1.46738
0.982149	0.806531	1.01569	1.16708
0.874785	0.688664	1.02601	1.10391
