# Supplementary material for: circPTPN12/miR-21–5 p/∆Np63α pathway contributes to human endometrial fibrosis
Source: eLife. 2021 Jun 16;10:e65735. doi: 10.7554/eLife.65735 (PMC8208816; doi:10.7554/eLife.65735)
Supplement: Figure 3—source data 4. [file elife-65735-fig3-data4.xlsx]

## Sheet: Sheet1
	miR-NC			miR-21
mut1	0.945947	0.973788	1.08027	0.77291	0.781906	0.753649
mut2	0.902023	1.00297	1.09501	0.597327	0.688021	0.715868
mut3	1.12144	0.901922	0.976639	1.07374	0.943062	0.830191
mut all	1.06408	1.06201	0.87391	0.953223	0.903513	0.804907
