# Supplementary material for: circPTPN12/miR-21–5 p/∆Np63α pathway contributes to human endometrial fibrosis
Source: eLife. 2021 Jun 16;10:e65735. doi: 10.7554/eLife.65735 (PMC8208816; doi:10.7554/eLife.65735)
Supplement: Figure 3—source data 5. [file elife-65735-fig3-data5.xlsx]

## Sheet: Sheet1
Ad-control	Ad-circPTPN12
0.02977	0.010525
0.008315	0.011924
0.022718	0.002687
0.030395	0.000735
0.016289	0.012174
0.027776
