# Supplementary material for: circPTPN12/miR-21–5 p/∆Np63α pathway contributes to human endometrial fibrosis
Source: eLife. 2021 Jun 16;10:e65735. doi: 10.7554/eLife.65735 (PMC8208816; doi:10.7554/eLife.65735)
Supplement: Figure 3—source data 7. [file elife-65735-fig3-data7.xlsx]

## Sheet: Sheet1
	Ad-control			Ad-circPTPN12
E-cad	0.74358	0.66628	0.672935	0.55669	0.527219	0.474375
N-cad	0.191354	0.208552	0.20494	0.735553	0.538259	0.788941
-SMA	0.496993	0.544633	0.563145	0.940442	0.877821	0.842941
FN	0.59915	0.535641	0.594181	0.727479	0.674108	0.777606
