# Supplementary material for: circPTPN12/miR-21–5 p/∆Np63α pathway contributes to human endometrial fibrosis
Source: eLife. 2021 Jun 16;10:e65735. doi: 10.7554/eLife.65735 (PMC8208816; doi:10.7554/eLife.65735)
Supplement: Figure 3—source data 9. [file elife-65735-fig3-data9.xlsx]

## Sheet: Sheet1
	Ad-control			Ad-circPTPN12			Ad-circPTPN12+miR-NC			Ad-circPTPN12+miR-21
E-cad	0.892405	1.02505	0.823856	0.77624	0.802513	0.897896	0.585718	0.688696	0.688077	0.824578	0.924626	0.925655
N-cad	0.89798	0.916403	0.762888	1.09484	1.03774	0.999559	0.871097	0.832649	1.01274	0.816161	0.841189	0.733263
-SMA	0.889308	0.854752	0.827555	1.55423	1.50189	1.3894	1.70776	1.77397	1.75446	0.799268	0.819824	0.76769
FN	0.792607	0.61011	0.5494	1.04197	0.846086	0.794174	1.07969	0.99281	0.843126	0.586813	0.588987	0.568972
