# Supplementary material for: circPTPN12/miR-21–5 p/∆Np63α pathway contributes to human endometrial fibrosis
Source: eLife. 2021 Jun 16;10:e65735. doi: 10.7554/eLife.65735 (PMC8208816; doi:10.7554/eLife.65735)
Supplement: Figure 4—source data 1. [file elife-65735-fig4-data1.xlsx]

## Sheet: Sheet1
pGL3-ΔNp63α	pGL3-ΔNp63α+miR-21	pGL3-ΔNp63α+inh-21	pGL3-ΔNp63α mut+miR-21	pGL3-ΔNp63α mut+inh-21
57.5085	37.9977	75.1824	60.183	53.5581
55.0875	35.5809	78.0775	66.9912	66.3647
56.4362	35.7685	77.2039	58.3564	54.5459
