# Supplementary material for: circPTPN12/miR-21–5 p/∆Np63α pathway contributes to human endometrial fibrosis
Source: eLife. 2021 Jun 16;10:e65735. doi: 10.7554/eLife.65735 (PMC8208816; doi:10.7554/eLife.65735)
Supplement: Figure 4—source data 2. [file elife-65735-fig4-data2.xlsx]

## Sheet: Sheet1
Mock	miR-21-5p	ΔNp63α+miR-NC	ΔNp63α+miR-21
0.0028	0.00095	0.79	0.24
0.0034	0.0014	0.9	0.19
0.0032	0.00089	0.71	0.21
