# Supplementary material for: circPTPN12/miR-21–5 p/∆Np63α pathway contributes to human endometrial fibrosis
Source: eLife. 2021 Jun 16;10:e65735. doi: 10.7554/eLife.65735 (PMC8208816; doi:10.7554/eLife.65735)
Supplement: Figure 4—source data 4. [file elife-65735-fig4-data4.xlsx]

## Sheet: Sheet1
miR-NC	miR-21
2.0469	0.9049
2.1515	1.0256
2.00724	0.936748
