# Supplementary material for: circPTPN12/miR-21–5 p/∆Np63α pathway contributes to human endometrial fibrosis
Source: eLife. 2021 Jun 16;10:e65735. doi: 10.7554/eLife.65735 (PMC8208816; doi:10.7554/eLife.65735)
Supplement: Figure 4—source data 5. [file elife-65735-fig4-data5.xlsx]

## Sheet: Sheet1
inh-NC	inh-21
0.588059	1.23222
0.541783	1.19387
0.482511	1.15492
