# Supplementary material for: circPTPN12/miR-21–5 p/∆Np63α pathway contributes to human endometrial fibrosis
Source: eLife. 2021 Jun 16;10:e65735. doi: 10.7554/eLife.65735 (PMC8208816; doi:10.7554/eLife.65735)
Supplement: Figure 4—source data 6. [file elife-65735-fig4-data6.xlsx]

## Sheet: Sheet1
pGL3-ΔNp63α+circ-control	pGL3-ΔNp63α+circPTPN12	pGL3-ΔNp63α mut+circ-control	pGL3-ΔNp63α mut +circPTPN12
1.12693	1.14936	0.91676	1.24213
0.964265	1.16772	0.983276	1.03114
0.911022	1.30835	1.08078	1.04371
0.965544	1.22914	1.09901	1.13369
1.03223	1.33827	0.920182	0.826457
