# Supplementary material for: circPTPN12/miR-21–5 p/∆Np63α pathway contributes to human endometrial fibrosis
Source: eLife. 2021 Jun 16;10:e65735. doi: 10.7554/eLife.65735 (PMC8208816; doi:10.7554/eLife.65735)
Supplement: Figure 4—source data 8. [file elife-65735-fig4-data8.xlsx]

## Sheet: Sheet1
Mock	Ad-ΔNp63α	Ad-ΔNp63α+miR-21	Ad-ΔNp63α+miR-21+circPTPN12
0	0.985366	0.850781	1.27718
0	1.07741	0.748518	1.22039
0	0.885239	0.727017	1.11779
