# Supplementary material for: circPTPN12/miR-21–5 p/∆Np63α pathway contributes to human endometrial fibrosis
Source: eLife. 2021 Jun 16;10:e65735. doi: 10.7554/eLife.65735 (PMC8208816; doi:10.7554/eLife.65735)
Supplement: Figure 4—source data 9. [file elife-65735-fig4-data9.xlsx]

## Sheet: Sheet1
E-cad	Ad-ctl	Ad-ΔNp63α+miR-NC	Ad-ΔNp63α+miR-21
	0.0066152	0.00548611	0.00988872
	0.0067542	0.00328475	0.00625795
	0.00803214	0.00466121	0.00634572
N-cad	Ad-ctl	Ad-ΔNp63α+miR-NC	Ad-ΔNp63α+miR-21
	0.000443125	0.000685764	0.000341
	0.00041345	0.000681027	0.000385762
	0.000399366	0.000711	0.000309023
α-SMA	Ad-ctl	Ad-ΔNp63α+miR-NC	Ad-ΔNp63α+miR-21
	0.000135916	0.000245839	0.000211801
	0.000132199	0.000304768	0.000125275
	0.000155586	0.000284359	0.000122003
FN	Ad-ctl	Ad-ΔNp63α+miR-NC	Ad-ΔNp63α+miR-21
	0.000557014	0.000729907	0.000425074
	0.000367492	0.000775	0.000549345
	0.000331202	0.000804288	0.000352522
