# Supplementary material for: circPTPN12/miR-21–5 p/∆Np63α pathway contributes to human endometrial fibrosis
Source: eLife. 2021 Jun 16;10:e65735. doi: 10.7554/eLife.65735 (PMC8208816; doi:10.7554/eLife.65735)
Supplement: Figure 4—source data 11. [file elife-65735-fig4-data11.xlsx]

## Sheet: Sheet1
	Mock			Ad-ΔNp63α			Ad-ΔNp63α+miR-21			Ad-ΔNp63α+miR-21+circPTPN12
E-cad	0.998797	0.74241	0.931774	0.528291	0.539524	0.589383	0.850104	0.726297	0.804094	0.614482	0.588908	0.506262
N-cad	0.789206	0.632098	0.765157	1.17048	0.881821	1.1842	0.627129	0.488202	0.52497	0.983674	0.78991	1.01057
-SMA	0.444649	0.306341	0.300468	0.848362	0.635987	0.849599	0.449068	0.396203	0.432164	0.737089	0.580855	0.707312
FN	0.182571	0.138563	0.216458	1.19669	1.1906	1.39678	1.01894	0.838945	1.00195	1.5652	1.07804	1.66456
