# Supplementary material for: circPTPN12/miR-21–5 p/∆Np63α pathway contributes to human endometrial fibrosis
Source: eLife. 2021 Jun 16;10:e65735. doi: 10.7554/eLife.65735 (PMC8208816; doi:10.7554/eLife.65735)
Supplement: Figure 5—source data 1. [file elife-65735-fig5-data1.xlsx]

## Sheet: Sheet1
Sham	M+AAV-con	M+AAV-circ
0.677245	3.68e-07	36.7011
1.98309	4.2e-06	8.38465
0.093283	2.11e-05	4.28041
1.24639	3.31e-05	0.542521
