# Supplementary material for: circPTPN12/miR-21–5 p/∆Np63α pathway contributes to human endometrial fibrosis
Source: eLife. 2021 Jun 16;10:e65735. doi: 10.7554/eLife.65735 (PMC8208816; doi:10.7554/eLife.65735)
Supplement: Figure 5—source data 2. [file elife-65735-fig5-data2.xlsx]

## Sheet: Sheet1
Sham	M+AAV-con	M+AAV-circ
3.18881	1.04465	0.015439
0.103161	0.103881	0.140929
0.174706	0.109804	0.026515
0.533302	0.151038	0.048132
