# Supplementary material for: circPTPN12/miR-21–5 p/∆Np63α pathway contributes to human endometrial fibrosis
Source: eLife. 2021 Jun 16;10:e65735. doi: 10.7554/eLife.65735 (PMC8208816; doi:10.7554/eLife.65735)
Supplement: Figure 5—source data 3. [file elife-65735-fig5-data3.xlsx]

## Sheet: Sheet1
	Sham				M+AAV-con				M+AAV-circ
E-cad	1.69644	0.0903136	2.03966	0.173567	0.774677	0.219655	1.27479	1.57877	0.392241	0.153955	0.115711	1.89257
N-cad	1.01709	1.26359	1.58467	0.134645	1.16002	2.85862	5.55153	4.15329	4.09114	8.1305	5.63439	6.56655
α-SMA	1.46668	0.225434	0.371714	1.93617	0.24173	0.368998	1.69561	0.273935	4.17499	1.71889	2.13018	1.5598
FN	0.357149	1.77104	0.230781	1.64102	0.770889	2.93752	0.213839	2.59295	4.97467	6.29672	1.99253	2.79839
