# Supplementary material for: circPTPN12/miR-21–5 p/∆Np63α pathway contributes to human endometrial fibrosis
Source: eLife. 2021 Jun 16;10:e65735. doi: 10.7554/eLife.65735 (PMC8208816; doi:10.7554/eLife.65735)
Supplement: Figure 5—source data 4. [file elife-65735-fig5-data4.xlsx]

## Sheet: Sheet1
Sham	M+AAV-con	M+AAV-circ
2.58428	0.403254	709.059
0.506896	0.438231	2005.52
0.113421	0.0363919	29.4411
0.795406	0.0683819	596.245
