# Supplementary material for: circPTPN12/miR-21–5 p/∆Np63α pathway contributes to human endometrial fibrosis
Source: eLife. 2021 Jun 16;10:e65735. doi: 10.7554/eLife.65735 (PMC8208816; doi:10.7554/eLife.65735)
Supplement: Figure 5—source data 5. [file elife-65735-fig5-data5.xlsx]

## Sheet: Sheet1
Sham	M+AAV+agomir-NC	M+AAV+agomir-21
0.381522	0.0883763	0.36601
0.646119	0.00604845	0.731988
1.97233	0.246545	0.763076
