# Supplementary material for: circPTPN12/miR-21–5 p/∆Np63α pathway contributes to human endometrial fibrosis
Source: eLife. 2021 Jun 16;10:e65735. doi: 10.7554/eLife.65735 (PMC8208816; doi:10.7554/eLife.65735)
Supplement: Figure 5—source data 6. [file elife-65735-fig5-data6.xlsx]

## Sheet: Sheet1
	Sham			M+AAV+agomir-NC			M+AAV+agomir-21
E-cad	0.154044	1.33924	1.50672	0.084871	0.00680785	0.0497698	1.22384	0.241721	0.774539
N-cad	0.0207	1.76024	1.21906	7.04095	1.55377	5.52422	1.37152	3.64463	2.59506
α-SMA	1.96457	0.308814	0.726622	14.4786	1.83674	3.06796	1.01592	0.194439	0.622338
FN	0.923696	0.109994	1.96631	10.819	4.01526	1.74774	0.653151	0.760748	3.04299
